# Supplementary material for: Visible-light-induced controlled radical polymerization of methacrylates mediated by a pillared-layer metal–organic framework
Source: Royal Society of Chemistry journal article supplement (doi:10.1039/c5gc02620b), 2016-01-01
Supplement: c5gc02620b1.pdf [file c5gc02620b1.pdf]

## Supporting Information

### **Visible-Light-Induced Controlled Radical Polymerization of Methacrylates Mediated by Pillared-Layer Metal-Organic Framework**

*Yue Liu,<sup>a</sup> Dashu Chen,<sup>a</sup> Xingyu Li,<sup>a</sup> Ziyang Yu,<sup>a</sup> Qiansu Xia,<sup>a</sup> Desheng Liang<sup>b</sup> and  
Hongzhu Xing\*,<sup>a</sup>*

<sup>a</sup> Provincial Key Laboratory of Advanced Energy Materials, College of Chemistry,  
Northeast Normal University, Changchun, 130024, China

<sup>b</sup> Shenzhen EPT Battery Co., Ltd, Shenzhen, 518109, China.

E-mail: [xinghz223@nenu.edu.cn](mailto:xinghz223@nenu.edu.cn).

## Materials

Zinc chloride ( $\text{ZnCl}_2$ , 98% purity, Tianjin Fuchen), terephthalic acid ( $\text{C}_8\text{H}_6\text{O}_4$ , 99%, Tianjin Heowns Biochem LLC), N, N-dimethylformamide (DMF, 99.8%, Tianjin Guangfu), hydrochloric acid (HCl, 36%~38%, Beijing Chemical Works), anthracene ( $\text{C}_{14}\text{H}_{10}$ , 98%, Tianjin Guangfu), 4-ethynylpyridine hydrochloride ( $\text{C}_7\text{H}_5\text{N}\cdot\text{HCl}$ , 95%, Bepharma Limited), bis(triphenylphosphine)palladium(II) dichloride ( $\text{PdCl}_2(\text{PPh}_3)_2$ , 15.2%, Aladdin), copper (I) iodide ( $\text{CuI}$ , 99.5%, Sinopharm Reagent Co., Ltd), ethyl  $\alpha$ -bromoisobutyrate (EBiB, 98%, Accela), copper(II) bromide ( $\text{CuBr}_2$ , 99%, Acros). N,N,N',N'',N'''-pentamethyldiethylenetriamine (PMDETA, 99%, TCI) and acetonitrile ( $\text{CH}_3\text{CN}$ , 99.9%, Acros) were used as received without any further purification. Triethylamine was prepared according to literature procedures and all other reagents were obtained from commercial sources and used as received.

## Synthesis of $\text{L}_1$

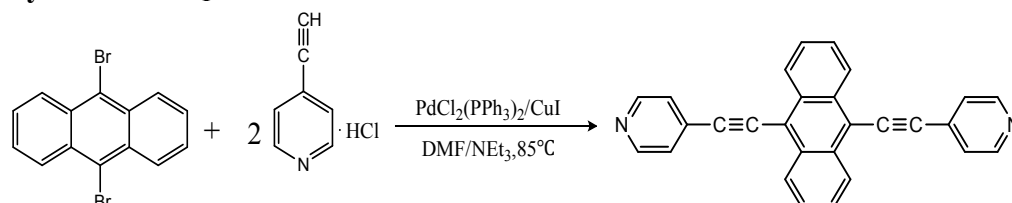

The synthesis of the anthracene derivative pillaring ligands was performed with Sonogashira reaction as the key step.<sup>1, 2</sup> In this process a coupling reaction between a terminal alkyne and a halogenated aromatic compound is effected. Typically, a mixture of 9,10-dibromoanthracene (1.008 g, 3.0 mmol), 4-ethynylpyridine hydrochloride (1.089 g, 7.8 mmol) and  $\text{PdCl}_2(\text{PPh}_3)_2$  (0.211 g, 10 mol %) was dissolved in the dry anaerobic triethylamine/DMF solution (1:1, 40 ml) in a round-bottom flask. The solution was allowed to stir for 10 min at room temperature and  $\text{CuI}$  (0.171 g, 30 mol %) was subsequently added. A stream of nitrogen was bubbled through the reaction system for about 1h in order to free it from air and the solution was heated to  $85^\circ\text{C}$  under reflux for one day in the nitrogen-filled environment. Then the solvents were removed with a rotary evaporator and the residue was dissolved in dichloromethane, filtered and purified on a silica column with a 1:1 mixture of ether :

ethyl acetate as the eluent. Orange solid of the ligand (0.330 g) were finally isolated (about 30% yield, on the basis of 4-ethynylpyridine hydrochloride). <sup>1</sup>H NMR (500 MHz, CDCl<sub>3</sub>, δ): 7.63 (4H, d, J = 6 Hz, PyH), 7.71 (4H, m, ArH), 8.66 (4H, m, PyH), 8.73 (4H, d, J = 6 Hz, PyH). IR (KBr)/ cm<sup>-1</sup>:  $\tilde{\nu}$  = 3036 (Arom. CH), 2205 (C≡C), 1733, 1588–1403 (Ar), 826 (4-monosubst. pyridine).

### Structure determination

Diffraction intensity data were collected on an Oxford Diffraction Xcalibur Eos diffractometer with graphite-monochromated Mo K $\alpha$  radiation ( $\lambda$  = 0.71073 Å). All data were collected at a temperature of 150 K. The structures were solved by the direct methods and refined on  $F^2$  by full-matrix least-squares using the SHELXTL-97 program.<sup>3</sup> The Zn<sup>2+</sup> ion was easily located and then non-hydrogen atoms (O, N and C) were placed from the subsequent Fourier-difference maps. A summary for data collection and refinements were given in Table S1.

**Table S1** Crystal data and structural refinement for **NNU-35**.

|                                               |                                                                               |
|-----------------------------------------------|-------------------------------------------------------------------------------|
| empirical formula                             | C <sub>75</sub> H <sub>47</sub> N <sub>5</sub> O <sub>9</sub> Zn <sub>2</sub> |
| formula weight                                | 1292.96                                                                       |
| crystal system                                | monoclinic                                                                    |
| space group                                   | <i>C2/c</i>                                                                   |
| <i>a</i> / Å                                  | 28.525                                                                        |
| <i>b</i> / Å                                  | 29.966                                                                        |
| <i>c</i> / Å                                  | 14.784                                                                        |
| $\beta$ / degree                              | 109.02                                                                        |
| <i>V</i> / Å <sup>3</sup>                     | 11947.1                                                                       |
| <i>Z</i>                                      | 8                                                                             |
| F(000)                                        | 5096                                                                          |
| $\theta$ range collected / degree             | 3.11 to 27.10                                                                 |
| limiting indices                              | $-36 \leq h \leq 36$ , $-32 \leq k \leq 37$ , $-18 \leq l \leq 18$            |
| Reflections collected / unique                | 33906 / 12815                                                                 |
| data / restraints / parameters                | 12815 / 38 / 821                                                              |
| <i>R</i> (int)                                | 0.1054                                                                        |
| goodness-of-fit on <i>F</i> <sup>2</sup>      | 1.085                                                                         |
| Final <i>R</i> indices ( $[I > 2\sigma(I)]$ ) | <i>R</i> <sub>1</sub> = 0.1421, <i>wR</i> <sub>2</sub> = 0.3663               |
| <i>R</i> indices (all data)                   | <i>R</i> <sub>1</sub> = 0.2260, <i>wR</i> <sub>2</sub> = 0.4121               |

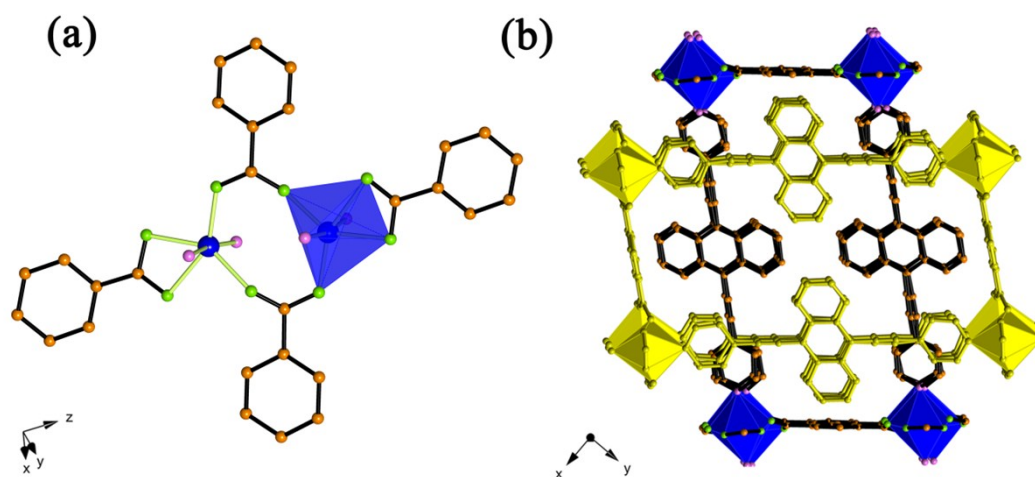

**Fig. S1** (a) Coordination arrangements of zinc dimers; (b) Two-fold interpenetration structure of NNU-35. Blue, green, pink, and orange spheres /polyhedra represent zinc, oxygen, nitrogen and carbon atoms, respectively. All hydrogen atoms were omitted for clarity.

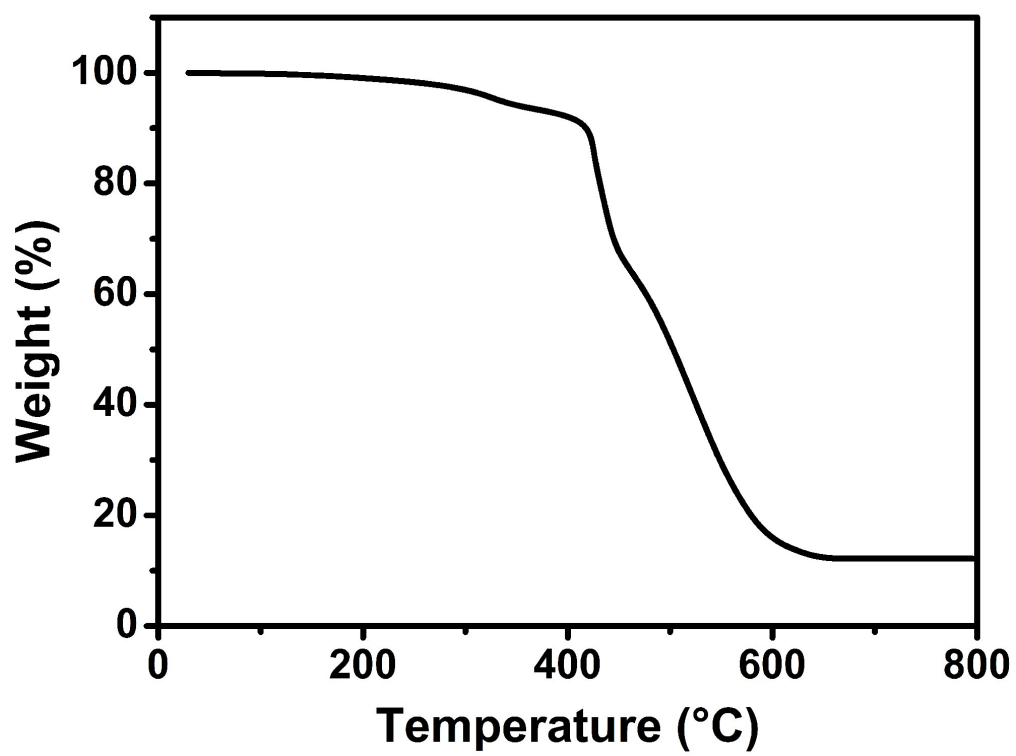

**Fig. S2** TGA curve of NNU-35.

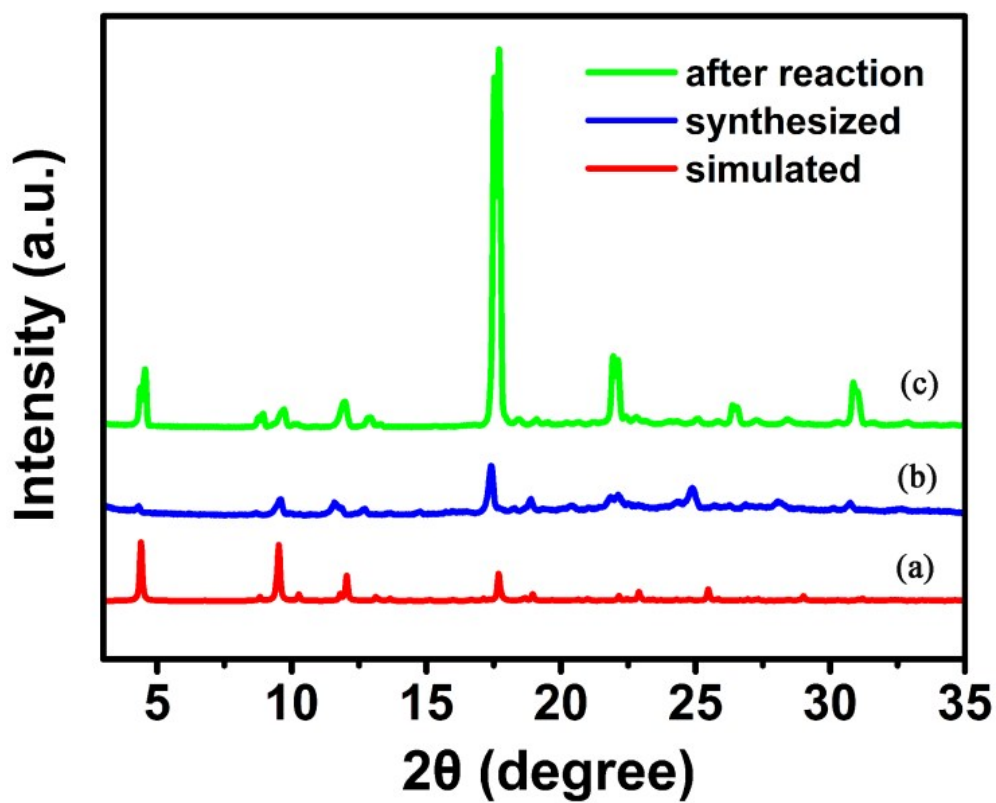

**Fig. S3** PXRD patterns of NNU-35. (a) simulated X-ray pattern from crystal structure; (b) PXRD pattern of the as-synthesized crystalline sample; (c) NNU-35 after photocatalysis reaction.

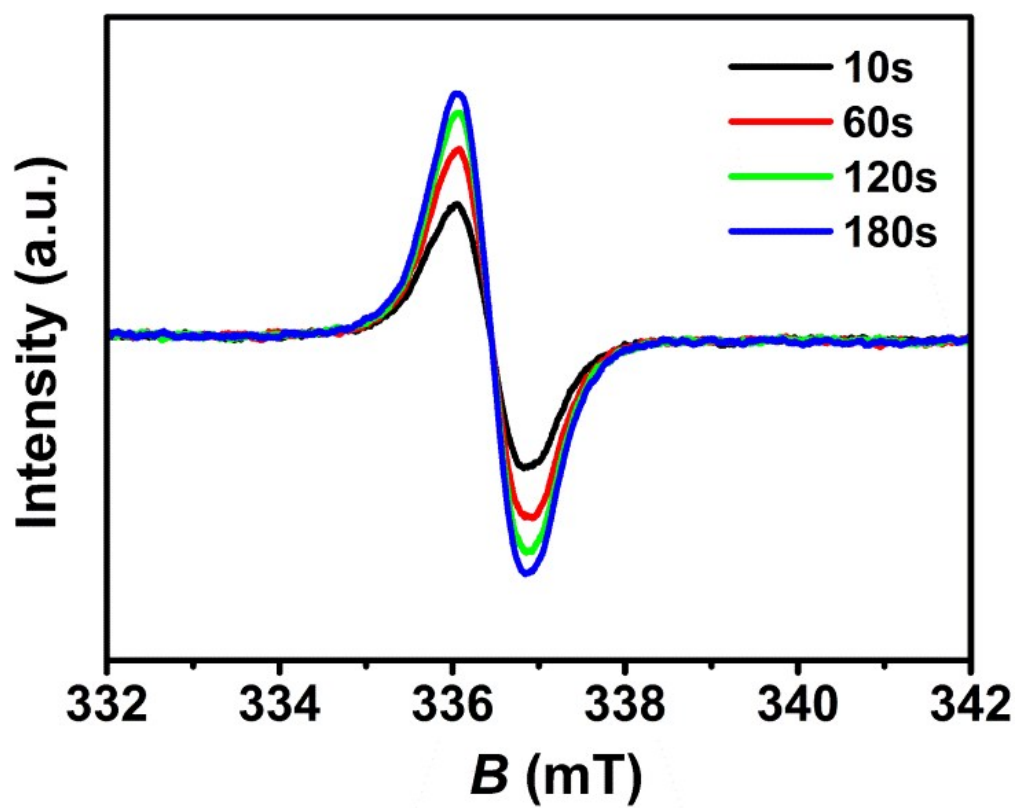

**Fig. S4** In situ time-evolution EPR spectra of pillaring ligand  $L_1$  in solid state under visible light .

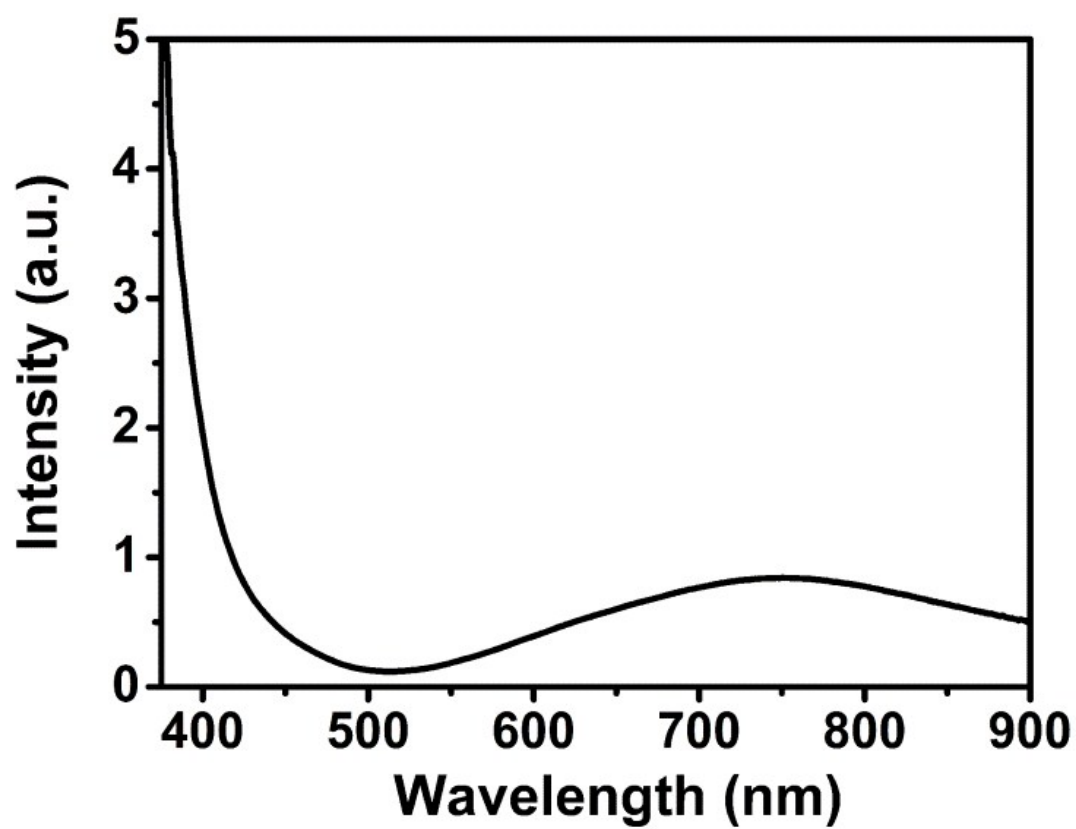

**Fig. S5** UV-vis spectrum for the ATRP reaction without NNU-35.

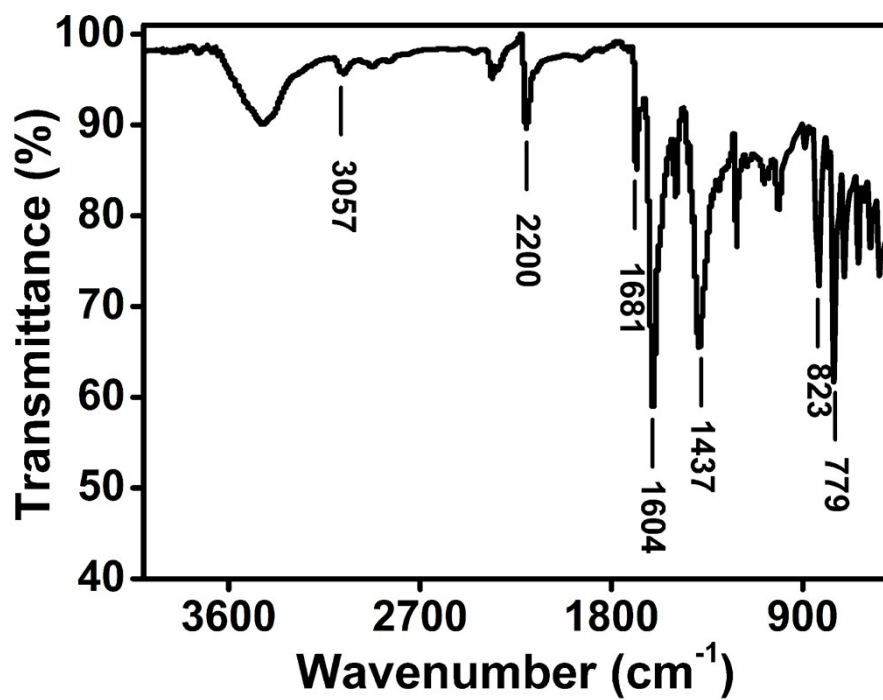

Fig. S6 IR spectrum of NNU-35.

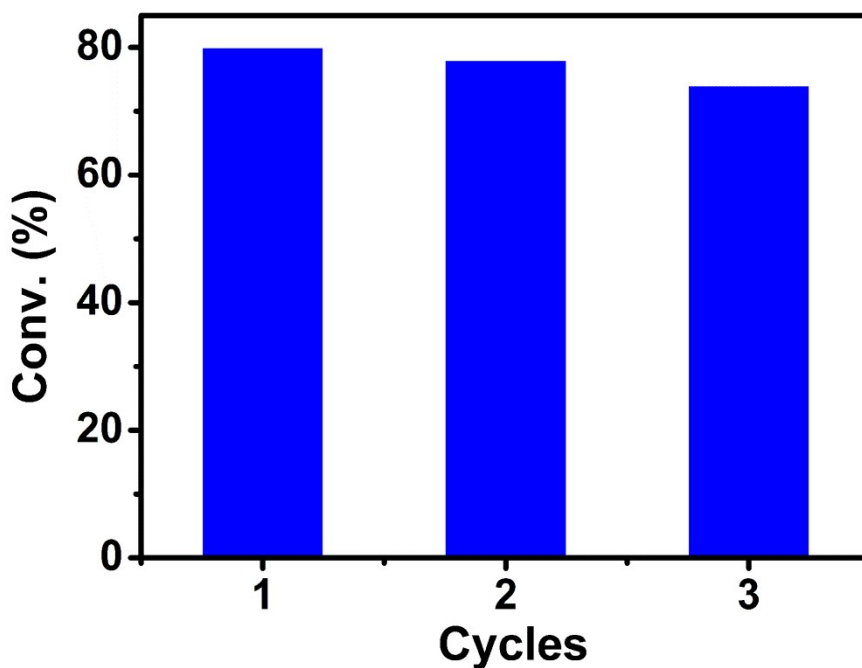

**Fig. S7** The reuse of **NNU-35** to initiate the visible-light-induced polymerization of MMA.  $[\text{MMA}]_0/[\text{EBiB}]_0/[\text{CuBr}_2]_0/[\text{PMDETA}]_0 = 200/1/0.2/0.6$  in 2mL acetonitrile, **NNU-35** = 20 mg, irradiation time = 14 h.

#### References:

- 1 T. M. Fasina, J. C. Collings, D. P. Lydon, D. Albresa-Jove, A. S. Batsanov, J.A. K. Howard, P. Nguyen, M. Bruce, A. J. Scott, W. Clegg, S. W. Watt, C. Viney, T. B. Marder, *J. Mater. Chem.* 2004, **14**, 2395-2404.
- 2 S. Winter, E. Weber, L. Eriksson, I. Csoregh, *New J. Chem.* 2006, **30**, 1808-1819.
- 3 G. M. Sheldrick, SHELXL-97, Program for X-ray Crystal Structure Refinement, University of Göttingen, Göttingen, Germany, 1997.
